# Supplementary material for: Micromirror-Embedded Coverslip Assembly for Bidirectional Microscopic Imaging
Source: MDPI journal article supplement (doi:10.3390/mi11060582), 2020-06-10
Supplement: s1 [file s1]

## Supplementary Information:

### Micromirror-embedded coverslip assembly for bidirectional microscopic imaging

Dongwoo Lee, Jihye Kim, Eunjoo Song, Ji-Young Jeong, Eun-chae Jeon, Pilhan Kim and Wonhee Lee\*

#### Supplementary Figures

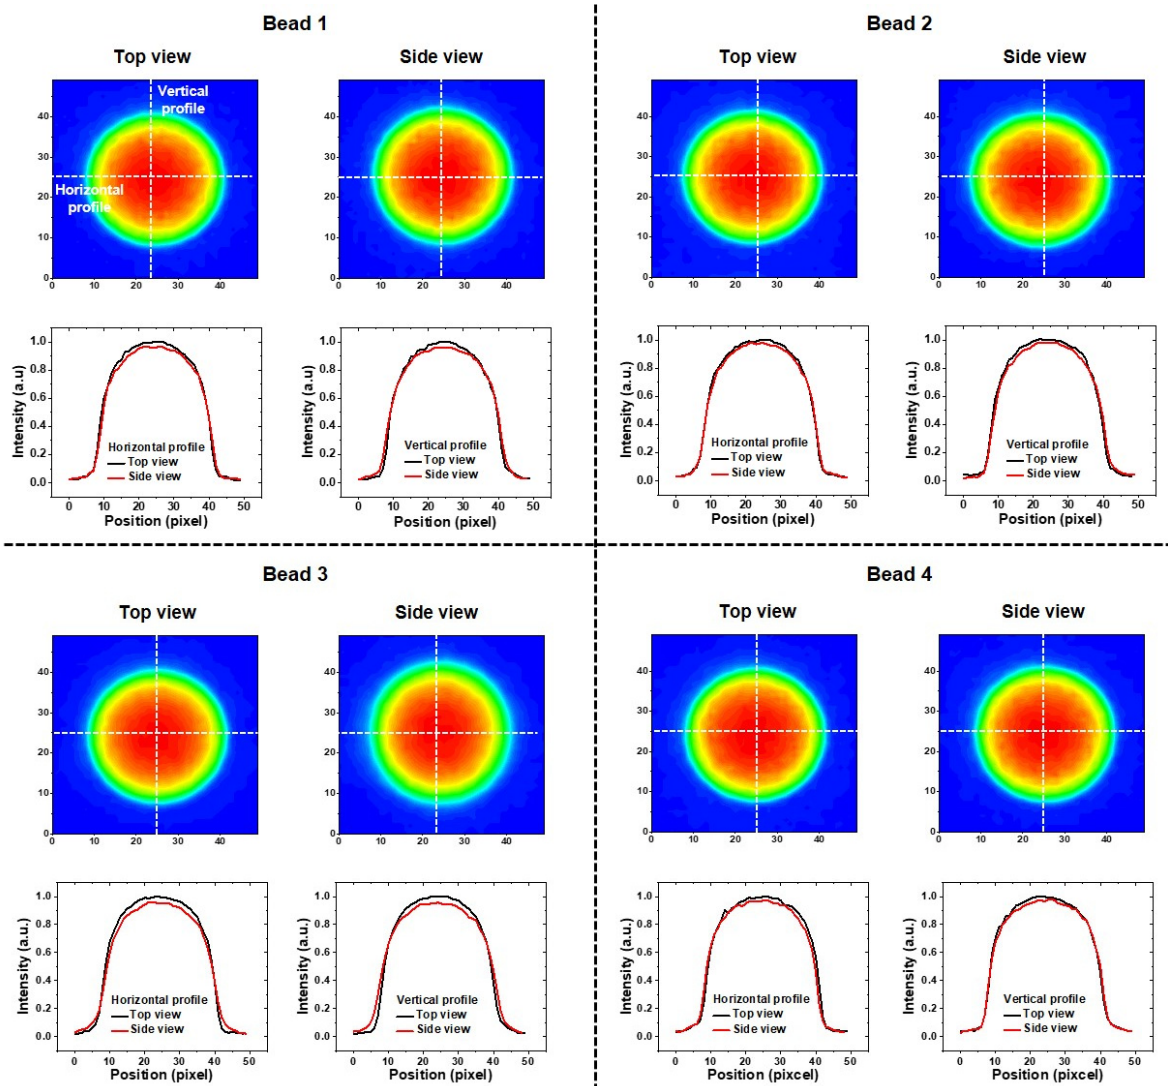

Figure S1. Intensity contours and intensity profiles in top-view and side-view of fluorescent beads.

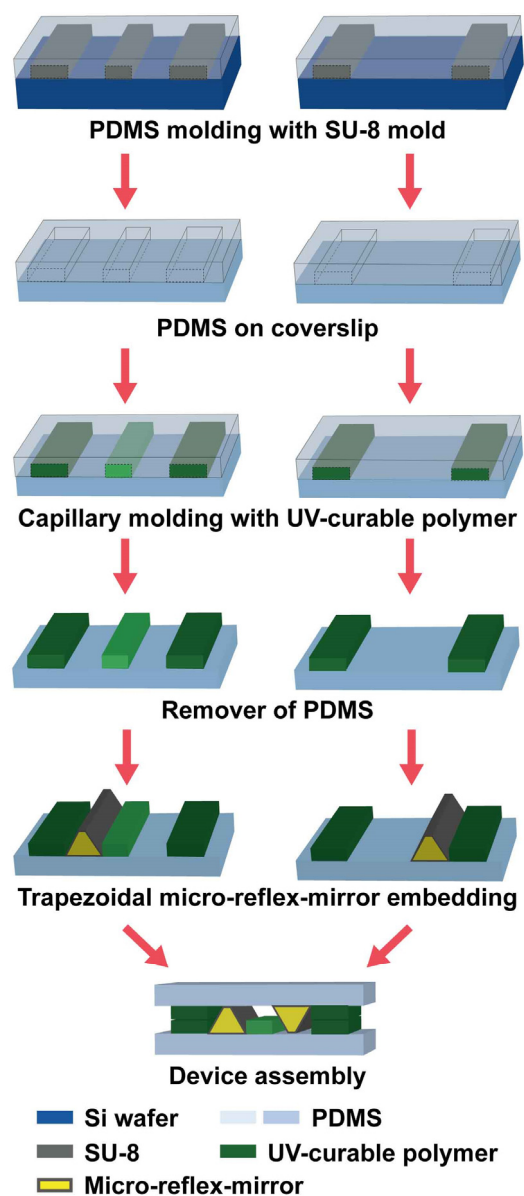

**Figure S2.** Fabrication steps of the micromirror-embedded coverslip with a stage for imaging of red blood cells.
